# Supplementary material for: A positive allosteric modulator of the β1AR with antagonist activity for catecholaminergic polymorphic ventricular tachycardia
Source: JCI journal article supplement (doi:10.1172/jci190252), 2025-10-16
Supplement: sd1 [file 1]

## 1 **Supplementary Materials and Methods:**

### 2 *Materials*

3           The following orthosteric ligands for  $\beta$ ARs or AT1R were purchased commercially:  
4 isoproterenol hydrochloride, epinephrine hydrochloride, norepinephrine bitartrate, carvedilol,  
5 metoprolol tartrate, ICI 118,551 hydrochloride, atenolol, angiotensin-II (Sigma-Aldrich, St. Louis,  
6 MO), dobutamine hydrochloride, carazolol (Cayman Chemical, Ann Arbor, MI), bucindolol  
7 (Santa Cruz Biotechnology, Dallas, TX), and alprenolol hydrochloride (Tocris Bioscience,  
8 Minneapolis, MN). BI-167107 was used as a high affinity agonist of the  $\beta_1$ AR and  $\beta_2$ AR (1).  
9 Heterotrimeric  $G_s$  (2), minimal cysteine  $\beta$ -arrestin1 truncated at amino acid 393 ( $\beta$ -arrestin1-mc)  
10 (3, 4), nanobody 35 (Nb35) (2), and antibody fragment 30 (Fab30) (5) were expressed and purified  
11 as previously described. Nanobody 25 (Nb25) was isolated and purified as previously described  
12 for Nb32 (6). The DNA-encoded small molecule library OpenDEL<sup>TM</sup> was synthesized by HitGen  
13 Inc. (Chengdu, China) through a ‘split-and-pool’ approach. Off-DNA synthesis of hit compounds  
14 was performed and validated with HPLC/MS (>90% purity) by HitGen Inc.

15  
16           FLAG- $\beta_1$ V<sub>2</sub>R and FLAG- $\beta_1$ V<sub>2</sub>R-RLucII constructs were generated using HiFi DNA  
17 assembly (New England Biolabs, Ipswich, MA) according to the manufacturer’s guidelines.  
18 Fragment inserts of human  $\beta_1$ AR truncated at residue G413 ( $\beta_1$ AR\_G413), the C-terminal tail of  
19 human vasopressin 2 receptor (V<sub>2</sub>R) encompassing amino acids 343-371 (V<sub>2</sub>R\_343-371), and  
20 V<sub>2</sub>R\_343-371 conjugated to RLucII were amplified by polymerase chain reaction (PCR) from  
21 pcDNA3 FLAG- $\beta_1$ AR (Addgene plasmid 14698; (7)) or V<sub>2</sub>R-RLucII (a gift from Dr. Sudar  
22 Rajagopal’s lab, Duke University) using primers listed in Supplemental Table 2. Gel-purified  
23 fragments were incubated with HiFi Master Mix (New England Biolabs) and inserted into a

24 linearized pcDNA3 empty vector (Addgene plasmid 10792). Plasmids were transformed into  
25 TOP10 *E. coli* (Thermo Fisher Scientific, Waltham, MA) and validated by DNA sequencing.

26

### 27 *Cell culture*

28 Human embryonic kidney (HEK) 293T cells were maintained in Minimum Essential  
29 Medium (MEM) supplemented with 10% fetal bovine serum (FBS) and 1%  
30 penicillin/streptomycin (P/S) in a humidified tissue culture incubator at 37 °C and 5% CO<sub>2</sub>. For  
31 bioluminescence resonance energy transfer (BRET) and GloSensor™ (Promega, Madison, WI)  
32 cellular signaling assays, HEK293T cells were transiently transfected using Lipofectamine™ 3000  
33 (Thermo Fischer Scientific, Waltham, MA) according to the manufacturer's standard protocol.  
34 Expi293T™ suspension cells stably expressing FLAG-β<sub>1</sub>AR (8), FLAG-β<sub>1</sub>AR\_G413, or FLAG-  
35 β<sub>2</sub>AR (9) were cultured in Expi293 Expression Medium (Invitrogen) with 10 μg/mL blasticidin  
36 and 10 μg/mL zeocin in a humidified tissue culture incubator maintained at 37 °C and 8% CO<sub>2</sub>  
37 under constant shaking.

38

### 39 *Receptor purification and generation of receptor nanodiscs*

40 Human FLAG-β<sub>1</sub>AR and FLAG-β<sub>2</sub>AR were expressed, purified, and reconstituted in high-  
41 density lipoprotein (HDL) particles to generate nanodiscs as previously described (4, 8).  
42 Biotinylation of the nanodisc membrane scaffold protein D1E3 (MSPD1E3) was utilized to  
43 facilitate immobilization to neutravidin beads. Chimeric β<sub>1</sub>AR containing the phosphorylated C-  
44 terminal tail of the vasopressin 2 receptor (V<sub>2</sub>R) was generated as previously described for the  
45 β<sub>2</sub>V<sub>2</sub>Rpp (4). Briefly, the sortase recognition sequence (LPETGHH) was inserted into the C-  
46 terminus of human FLAG-β<sub>1</sub>AR after amino acid G413 to generate FLAG-β<sub>1</sub>AR\_G413 (SFig. 1A-

47 B). Following expression and detergent solubilization, FLAG- $\beta_1$ AR\_G413 was ligated to the  
48 synthetic phospho-peptide corresponding to the C-terminal tail of the V<sub>2</sub>R (GGG-V<sub>2</sub>Rpp) via  
49 incubation with sortase to generate FLAG- $\beta_1$ V<sub>2</sub>Rpp (SFig. 1B) (4). Prior to screening,  
50 reconstituted FLAG- $\beta_1$ AR and FLAG- $\beta_1$ V<sub>2</sub>Rpp nanodiscs were validated by radioligand binding  
51 to ensure nanodiscs contained functional receptors (SFig. 1C-D).

52

### 53 *Validation of the screening protocol*

54 To measure the immobilization efficiency of purified  $\beta_1$ AR or  $\beta_1$ V<sub>2</sub>Rpp biotinylated  
55 nanodiscs, a fixed quantity of pre-washed high capacity neutravidin beads (Pierce) were incubated  
56 with increasing concentrations of nanodisc in binding buffer (20 mM HEPES pH 7.4, 100 mM  
57 NaCl) at room temperature for 1 hour while rotating. After collecting flow through, the nanodisc-  
58 coated beads were washed three times with binding buffer and bound protein was eluted via boiling  
59 at 95 °C. Samples were loaded onto 10% SDS-polyacrylamide gels for analysis by Coomassie  
60 Blue and a 1:1 ratio of receptor nanodisc ( $\mu$ g) to bead slurry ( $\mu$ L) was deemed optimal given  
61 minimal loss of nanodisc in the flow through (SFig. 2A).

62

63 To confirm the integrity of the G protein and  $\beta$ -arrestin complexes throughout the screening  
64 procedure,  $\beta_1$ AR or  $\beta_1$ V<sub>2</sub>Rpp nanodiscs were immobilized as described above to pre-washed high-  
65 capacity neutravidin beads along with 20  $\mu$ M of the high-affinity agonist, BI-167107 (BI), and a  
66 1.2 molar excess of heterotrimeric Gs or  $\beta$ -arrestin1-mc, respectively. To enhance complex  
67 stability,  $\beta_1$ AR/Gs complexes were supplemented with Nb35 (2.5 molar excess with respect to  
68  $\beta_1$ AR) and 0.05 U/mL apyrase, while the  $\beta_1$ V<sub>2</sub>Rpp/ $\beta$ -arrestin1 complex was further stabilized with  
69 Nb25 and Fab30 (2.5 or 1.7 molar excess relative to  $\beta_1$ V<sub>2</sub>Rpp, respectively). Following complex

70 formation, the flow through was collected and the beads were washed three times with ice-cold  
71 binding buffer supplemented with 10  $\mu$ M BI. To simulate incubation with DNA-encoded  
72 molecules, 1mg/mL salmon sperm DNA (Ambion) was applied to neutravidin-immobilized  
73  $\beta_1$ AR/Gs and  $\beta_1$ V<sub>2</sub>Rpp/ $\beta$ -arrestin1 complexes in binding buffer containing 20  $\mu$ M BI for 1 hour  
74 while agitating (1150 rpm). The secondary flow through was collected, bound protein was eluted  
75 via boiling at 95 °C, and samples were loaded onto 10% SDS-polyacrylamide gels for analysis by  
76 Coomassie Blue to ensure the stability of receptor-transducer complexes throughout the selection  
77 protocol (SFig. 2B-C).

78  
79 To validate the retention of small molecule ligands to the  $\beta_1$ AR or  $\beta_1$ V<sub>2</sub>Rpp nanodiscs  
80 during screening, 5 nM of the radiolabeled orthosteric antagonist [<sup>3</sup>H]-dihydroalprenolol (H<sup>3</sup>-  
81 DHA, 105 Ci/mmol, PerkinElmer) was incubated with neutravidin-immobilized nanodiscs and  
82 washed three times with ice-cold binding buffer. To elute, beads were resuspended in 1.5% Fos-  
83 choline (Anatrace) in water and incubated at 37 °C (15 min) then 95 °C (15 min) while agitating  
84 (1150 rpm). The elution procedure was repeated a second time, combined, and applied to 5 mL  
85 scintillation fluid (LefkoFluor) for overnight incubation. H<sup>3</sup>-DHA counts were obtained with a  
86 TriCarb 2800TR liquid scintillation counter (PerkinElmer). Empty nanodiscs were utilized as a  
87 control to assess non-specific binding (SFig. 2D).

88

### 89 *DNA-encoded small molecule library screening*

90 Dried aliquots of OpenDEL™ were resuspended in 50  $\mu$ L water and incubated overnight  
91 at 4 °C to dissolve fully. Approximately 60  $\mu$ g (~0.5 nmol) of  $\beta_1$ AR or  $\beta_1$ V<sub>2</sub>Rpp nanodiscs were  
92 immobilized to pre-washed high capacity neutravidin beads along with transducer proteins (if

93 applicable), 20  $\mu$ M BI (if applicable) and conformation stabilizing reagents as described above in  
94 500  $\mu$ L of binding buffer. Complexes were incubated for one hour at room temperature while  
95 rotating and washed three times with 1 mL of ice-cold binding buffer containing 10  $\mu$ M BI. Prior  
96 to library incubation, 1  $\mu$ L (2%) of dissolved OpenDEL<sup>TM</sup> was set aside for qPCR as input. The  
97 washed nanodisc-coated beads were resuspended in OpenDEL<sup>TM</sup>, further diluted to 100  $\mu$ L in ice-  
98 cold binding buffer supplemented with 1 mg/mL salmon sperm DNA and 20  $\mu$ M BI, and incubated  
99 for 1 hour at room temperature while agitating. To remove unbound molecules, beads were washed  
100 three times with 500  $\mu$ L ice-cold binding buffer containing 1 mg/mL salmon sperm DNA and 20  
101  $\mu$ M BI. Samples were eluted twice in 53  $\mu$ L water containing 1.5% Fos-choline while agitating at  
102 37 °C (15 min) then 95 °C (15 min). The combined elution was applied to the QIAquick Nucleotide  
103 Removal Kit (Qiagen, Hilden, Germany) and eluted in 70  $\mu$ L water to isolate DNA-encoded  
104 molecules. Following DNA purification, 1.4  $\mu$ L (2%) was set aside for qPCR analysis and the  
105 remaining elution was diluted to 100  $\mu$ L in binding buffer containing 1 mg/mL salmon sperm DNA  
106 and 20  $\mu$ M BI to apply as library input for a second round of affinity selection with freshly  
107 immobilized protein complexes. Following a second round of selection and purification of DNA-  
108 encoded molecules, samples were PCR amplified and subjected to next-generation DNA  
109 sequencing (HitGen Inc.) to decode binders. Of note, BI was omitted from wash buffers in the apo-  
110  $\beta_1$ AR and empty nanodisc conditions. All solutions were prepared in DNase/RNase free UltraPure  
111 distilled water (Invitrogen, Waltham, MA) and all centrifugation steps were performed at 3000 xg  
112 for 1 min to pellet beads.

113

114 *Determining library decay by qPCR*

115 Aliquots of library input and elution collected as described above were diluted in qPCR  
116 sample buffer (10 mM Tris pH 8, 0.05% tween-20) and amplified along a standard curve of  
117 OpenDEL™ reference library samples using 2X SYBR Green qPCR Mix (Thermo Fischer  
118 Scientific) according to the manufacturer's protocol. Universal forward and reverse primers  
119 (OpenDEL™) were used to target the 5' and 3' ends of the DEL sequence which are identical  
120 across all molecules. Thermocycling was conducted as follows on a QuantStudio5™ (Applied  
121 Biosystems): 95 °C 10 min, ([95 °C 10s, 55 °C 10s, 72 °C 13s \*collect signal] x 40 cycles). All  
122 solutions were prepared in DNase/RNase free UltraPure distilled water (Invitrogen) and each  
123 sample was performed in duplicate.

124

125 *Next-generation sequencing*

126 The selection output was amplified by PCR using Q5 Hot Start High-Fidelity 2X Master  
127 Mix (NEB, M0494L). Amplicons were purified by QIAGEN-MinElute PCR Purification Kit  
128 (QIAGEN, 28006) and quantified using Qubit DNA High-Sensitivity kit (Invitrogen, 32854)  
129 before library construction and sequencing. The library preparation was performed with Nextflex  
130 Rapid DNA-Seq Kit (BI00 Scientific, 5144-08) following the manufacturer's manual and libraries  
131 were sequenced on the Illumina NovaSeq platform (Illumina, USA) by HitGen. After sequencing,  
132 samples were decoded and analyzed as previously reported (10), and the results were visualized in  
133 DataWarrior (OpenMolecules) with each dimension representing one cycle of DEL construction.

134

135 *Chemical feature enrichment analysis*

136 The enrichment of a particular DEL chemotype (i.e., chemical feature) was assessed as  
137 previously described (10). Feature intensity enrichment scores were calculated as follows: sum of  
138 sequence counts for one feature divided by the average of the sum of sequence counts for all  
139 possible parallel features in the library. Chemical features that were highly enriched in the BI-  
140 bound  $\beta_1$ AR condition, potentially enriched in the apo- $\beta_1$ AR sample, and minimally present in the  
141 G protein or  $\beta$ -arrestin transducer complex conditions were selected as potential hits. Signals that  
142 were present in the empty nanodisc control were excluded, as well as biotin-like binders. The  
143 structures of enriched features were further examined, and promiscuous features were cross-  
144 checked with the HitGen selection database (10).

145

#### 146 *Isothermal titration calorimetry (ITC)*

147 Physical interaction of C11 with  $\beta_1$ AR bound to the high-affinity agonist BI-167107 was  
148 measured via ITC on a MicroCal PEAQ-ITC system (Malvern Panalytical) at 25 °C. Purified  
149  $\beta_1$ AR in maltose neopentyl glycol (MNG) (Anatrace; Maumee, OH) was dialyzed against 20 mM  
150 HEPES, pH 7.5, containing 100 mM NaCl, 0.01% MNG, and 0.001% cholesteryl hemisuccinate  
151 (HNMC). A volume of 200  $\mu$ L of 15  $\mu$ M  $\beta_1$ AR bound to BI-167107 (typical ligand concentration  
152 set at 300  $\mu$ M in HNMC buffer) was loaded into the sample cell. To mitigate solubility limitations,  
153 the syringe solution containing 40  $\mu$ L of C11 was gradually brought to a final concentration of 200  
154  $\mu$ M in HNMC buffer (with BI-167107 at 300  $\mu$ M) through incremental dilution steps, followed by  
155 brief sonication (~2 min) and a high-speed spin (15 s at 12,000  $\times$  g). The clarified solution was  
156 then used for titrations, beginning with a 0.4  $\mu$ L injection followed by nineteen 2.0  $\mu$ L injections  
157 (at 180 s intervals) into the  $\beta_1$ AR–BI-167107 sample cell. During the experiment, the reference  
158 power was set to 7  $\mu$ cal $\cdot$ s $^{-1}$  and the sample cell was stirred continuously at 750 rpm. ITC raw data

159 were baseline-corrected, peak areas integrated and fitted using a one-site nonlinear least-squares  
160 model in MicroCal analysis software to obtain binding parameters including equilibrium  
161 dissociation constant ( $K_D$ ), and stoichiometry (N).

162

### 163 *FLIPR Ca<sup>2+</sup> Assay (HEK293T)*

164 HEK293T cells that endogenously express the M3 muscarinic acetylcholine receptor  
165 (M3R) (11) were plated at a density of 50,000 cells/well in poly-D-lysine-coated 96-well black,  
166 clear-bottom well plates and incubated overnight at 37 °C and 5% CO<sub>2</sub>. Media was removed from  
167 plates and the cells were incubated with Ca<sup>2+</sup>-sensitive fluorescent dye from the FLIPR Calcium 6  
168 assay kit (Molecular Devices, San Jose, CA) for 2 hours according to the manufacturer's  
169 instructions. To study the effect of C11 on the Gq-coupled M3R, cells were pre-treated with  
170 vehicle (0.19% DMSO) or 30 μM C11 for 20 minutes. Fluorescence was measured with the  
171 FlexStation 3 microplate reader (Molecular Devices) for 2 minutes. Cells were stimulated with  
172 carbachol 20 seconds after starting fluorescence measurements. Baseline adjustments for each well  
173 were done by subtracting the average signal from the first 10 seconds of measurement. All Ca<sup>2+</sup>  
174 responses were quantified as baseline-adjusted area under the curve of the fluorescent signal and  
175 presented as percent DMSO maximum.

176

### 177 *Phospho-ERK assay*

178 Evaluation of β<sub>1</sub>AR-mediated activation of extracellular signal-regulated kinase (ERK)  
179 was performed as previously described with minor modifications (8). Briefly, 2.25 x 10<sup>6</sup> HEK293T  
180 cells maintained in growth media were seeded in a 10 cm dish, incubated overnight, and transfected  
181 with 2 μg human FLAG-β<sub>1</sub>AR. After 24 hours, cells were re-plated in 6-well assay plates at a

182 density of  $7.5 \times 10^5$  cells/well in growth media. Cells were starved for 3 hours in serum-free media  
183 (MEM supplemented with 0.1% BSA, 10 mM HEPES, and 1% P/S), pre-treated with vehicle  
184 (0.19% DMSO) or 30  $\mu$ M C11 for 20 minutes at 37 °C along with 100 nM ICI-118,551 to block  
185 endogenous  $\beta_2$ ARs, and stimulated with serial concentrations of isoproterenol or carvedilol for 5  
186 minutes. Cells were subsequently harvested in ice-cold lysis buffer (20 mM Tris pH 7.4, 137 mM  
187 NaCl, 20% glycerol, 1% Nonidet P-40, 2 mM sodium orthovanadate, 1 mM  
188 phenylmethylsulphonyl fluoride, 10 mM sodium fluoride, 10  $\mu$ g/mL aprotinin, 5  $\mu$ g/mL leupeptin,  
189 and phosphatase inhibitors) and rotated for 30 minutes at 4 °C. Cell lysates were separated on a  
190 10% SDS-polyacrylamide gel and transferred to a polyvinylidene difluoride (PVDF) membrane.  
191 Blocked membranes were probed with anti-p44/42 MAPK (1:1000; Cell Signaling Technology,  
192 Danvers, MA) or anti-MAPK 1/2 (1:2000; Millipore, Burlington, MA) primary antibodies, and  
193 horseradish peroxidase (HRP)-conjugated secondary antibodies (1:3000; donkey anti-rabbit IgG,  
194 NA934V, Cytiva, Marlborough, MA). Following incubation with ECL chemiluminescent  
195 substrate (SuperSignal<sup>TM</sup>, Thermo Fischer Scientific), immunoreactive bands were visualized with  
196 a ChemiDoc XRS+ imager (Bio-Rad, Hercules, CA). Densitometry of phospho-ERK was  
197 performed with ImageJ and normalized to total-ERK. The mean  $\pm$  SEM of at least 3 technical  
198 replicates were plotted in GraphPad Prism and fit to a log(agonist) vs response (three parameter)  
199 model. Statistical analysis of the nonlinear curve fit ( $E_{max}$ ) was evaluated by two-tailed t-test.

200

#### 201 *High-Performance Liquid Chromatography–Mass Spectrometry (HPLC-MS) Analysis*

202 Stability analysis of C11 was performed on a 6224 TOF LC/MS system (Agilent  
203 Technologies), consisting of a 1200 HPLC (degasser, binary pump, thermostated column  
204 compartment, diode array detector (DAD)) coupled to a 6224 accurate-mass time-of-flight mass

205 spectrometer. The mass spectrometer was equipped with a Dual ESI source, and accurate mass  
206 data was obtained by internal calibration (reference ion 922.009798 m/z) using a secondary  
207 nebulizer to deliver the reference solution continuously. Positive-ion mass spectral data were  
208 acquired in full-scan mode over the range of 75-3200 m/z using the following source parameters:  
209 gas temperature 325 °C, gas flow 11 L/min, nebulizer pressure 33 psig, VCap 3500 V, and  
210 fragmented voltage 150 V. Aliquots of 10 mM C11 formulated in a mixture of DMSO/PEG400  
211 (50%/50%, v/v) were incubated at 37 °C and withdrawn at different time points (0, 1, 6, 12, 24,  
212 48, and 72 hours), flash-frozen in liquid nitrogen, and afterward transferred into a -80 °C freezer  
213 until HPLC-MS analysis. All C11 samples were first diluted with 50% acetonitrile in ddH<sub>2</sub>O to  
214 obtain 250 µM solutions. Subsequently, HPLC separations were achieved on an Agilent Zorbax  
215 SB-C18 column (2.1 × 150 mm I.D., particle size 3.5 µm) using a linear gradient of mobile phase  
216 B in A, a flow rate of 0.5 mL/min. Mobile phase A was prepared by combining 400 mL ultrapure  
217 water with 12 mL methanol and 1.2 mL formic acid. Mobile phase B was prepared by mixing 400  
218 mL acetonitrile with 12 mL ultrapure water and 1.2 mL formic acid. The gradient program  
219 included an initial hold at 0% solvent B for 0.5 min, followed by a linear increase to 100% solvent  
220 B from 0.5-8 min, hold at 100% solvent B from 8.1-9 min, and re-equilibration back to 0% B for  
221 a total run time of 15 min. Samples were analyzed using a 1 µL injection volume. Target compound  
222 (C11) was confirmed by mass spectral data in positive ion mode, and U.V. spectra peaks (254  
223 nm) were integrated to determine values for relative content and %-area purity (relative to t = 0 as  
224 100% and then plotted as a function of time). Little to no impurities were detectable in C11. C11  
225 had a purity of over 95% with a molecular ion peak, [M+H] at 561.34323 m/z.

226 *Pharmacokinetics of C11 in mice*

227 Male CD-1 mice (n=4; average body weight 28 g) were injected intraperitoneally with 10  
228 mg/kg of C11 as 100  $\mu$ L formulation containing 10% DMA, 40% PEG-300, 2% Tween 80, and  
229 48% saline. For plasma, whole blood (~30  $\mu$ L) was collected serially (“tail snip”) at 5, 15, 30  
230 minutes, 1, 3, 8, and 24 hours into vials containing 1  $\mu$ L of 75 mg/mL K<sub>2</sub>EDTA in water, and  
231 immediately frozen until the day of analysis. Heart tissue was harvested from 3 mice per time-  
232 point (30 minutes, 1 hour, and 3 hours) without saline perfusion. For liquid chromatography  
233 tandem-mass spectrometry (LC/MS/MS) analysis, 10  $\mu$ L of each plasma sample was mixed with  
234 20  $\mu$ L of methanol/chloroform (1:1) fortified with 20 ng/mL C11-A (internal standard) and  
235 vigorously agitated in FastPrep FP120 apparatus (Thermo-Savant) at speed 4 for 45 seconds. After  
236 precipitation at -20 °C for 15 min and centrifugation at 14,000 xg for 5 min at room temperature,  
237 20  $\mu$ L of supernatant was mixed with 20  $\mu$ L of mobile phase A (see below), and 5  $\mu$ L injected into  
238 LC/MS/MS system. For heart tissue analysis, the sample was homogenized with 3 parts water and  
239 100  $\mu$ L homogenate mixed with 10  $\mu$ L of 20 ng/mL C11-A and 200  $\mu$ L chloroform. After agitation  
240 and centrifugation, 150  $\mu$ L of organic (lower) layer was evaporated to dryness (nitrogen stream),  
241 reconstituted with mobile phase A/mobile phase B (1:1) and 10  $\mu$ L injected into LC/MS/MS  
242 system. LC/MS/MS (Agilent 1200 series HPLC and Sciex/Applied Biosystems API 5500 QTrap)  
243 was utilized to quantify C11. Analytical column: Agilent Eclipse Plus (C<sub>18</sub>, 1.8  $\mu$ m, 50  $\times$  4.6 mm),  
244 at 40 °C. Mobile phase: (A) 0.1% formic acid, 2% acetonitrile in water, (B) acetonitrile. Isocratic  
245 elution: 30% A, 70% B. Run time: 2 min. Mass spectrometer parameters (voltages, gas flow, and  
246 temperature) were optimized by infusion of 100 ng/mL of analytes in mobile phase at 10  $\mu$ L/min  
247 using Analyst 1.6.2 software tuning module. The MS/MS (m/z) transitions used for quantification:  
248 561.2/353.1 (C11), 575.4/353.1 (C11-A; internal standard). A set of calibrator samples in drug-

249 free matrix was prepared by adding appropriate amounts of pure analyte (C11) in 0.243 - 100  
250 ng/mL range. The calibration samples were analyzed alongside the experimental samples.  
251 Accuracy acceptance criteria was 85% for each but the lowest level (80%, LLOQ = 0.243 ng/mL).  
252 Non-compartmental approach within WinNonlin (2.1) software was used for modeling of  
253 concentration/time data to calculate relevant pharmacokinetic parameters.  
254

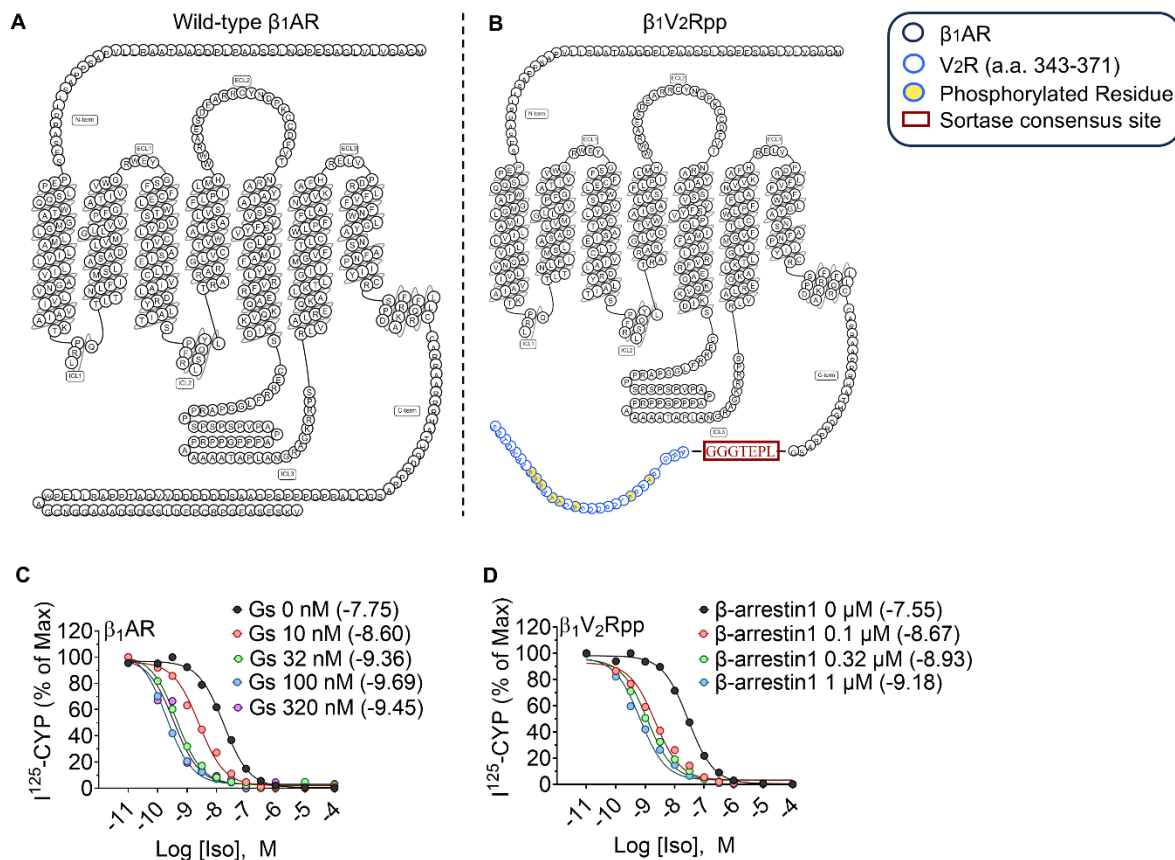

255  
 256 **Supplemental Fig. 1. Generation and functional validation of  $\beta_1$ AR and  $\beta_1$ V<sub>2</sub>Rpp nanodiscs.**  
 257 **(A-B)** Snake diagrams of wild-type (A) and chimeric (B)  $\beta_1$ ARs highlighting the cloning site of  
 258 the sortase consensus sequence. The synthetic phospho-peptide corresponding to the V<sub>2</sub>R was  
 259 ligated to  $\beta_1$ AR truncated at G413 to generate  $\beta_1$ V<sub>2</sub>Rpp. **(C-D)** Reconstituted nanodiscs containing  
 260  $\beta_1$ AR (C) or  $\beta_1$ V<sub>2</sub>Rpp (D) were functionally validated using radioligand competition binding  
 261 experiments in the presence of increasing concentrations of heterotrimeric G<sub>s</sub> or  $\beta$ -arrestin1,  
 262 respectively, to confirm transducer cooperativity. Values are presented as percent of maximum  
 263 I<sup>125</sup>-CYP binding. IC<sub>50</sub> values (shown in parenthesis, in Molar units) were calculated from the  
 264 nonlinear fit (one-site binding; GraphPad prism).  
 265

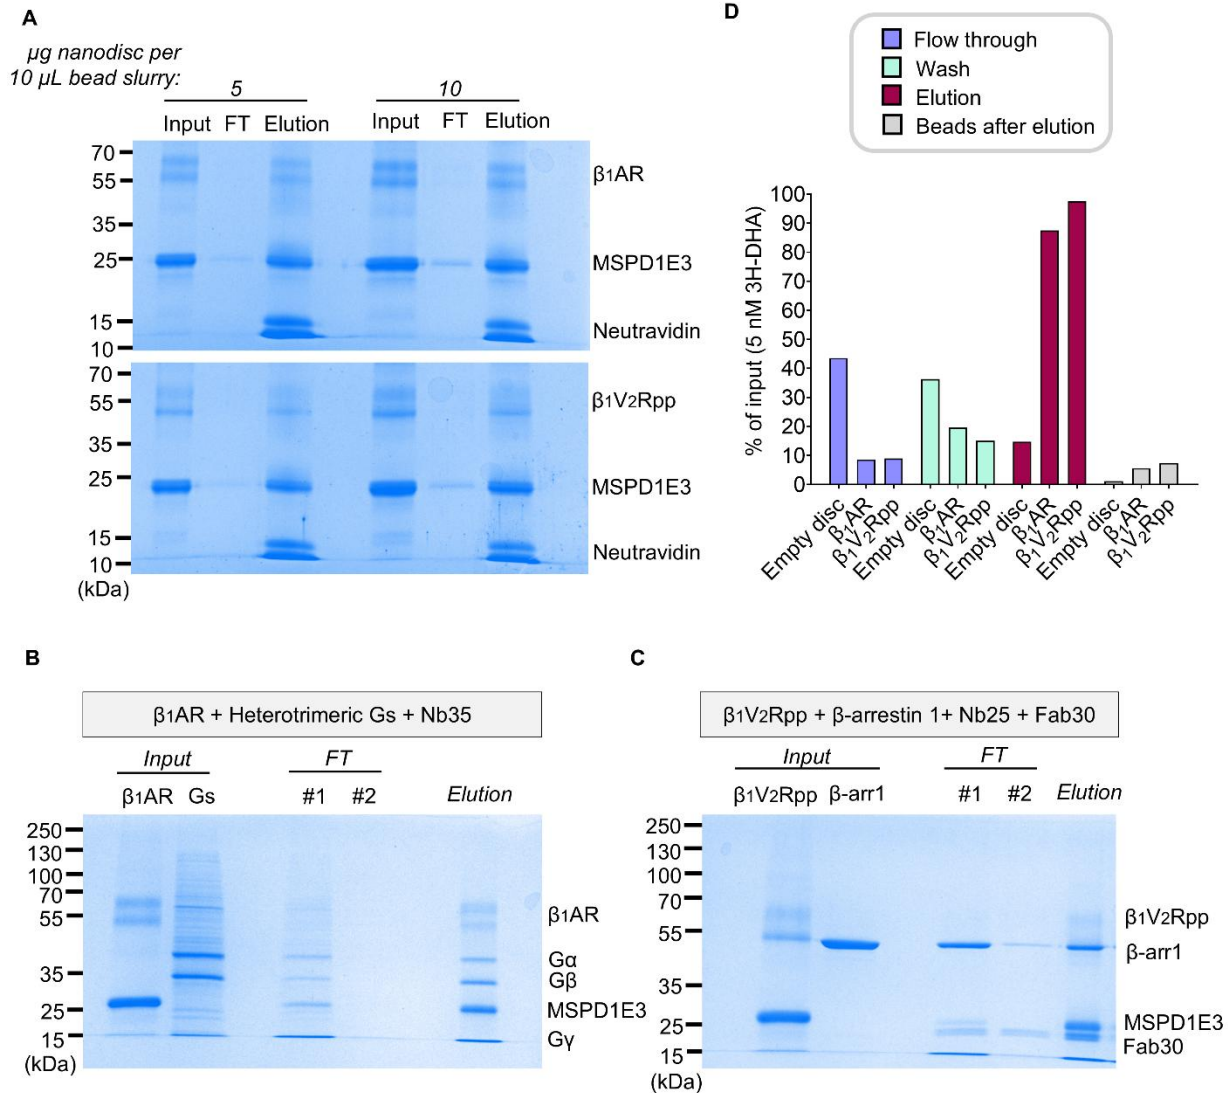

266  
267 **Supplemental Fig. 2. Optimization of DEL affinity selection protocol.** (A) The immobilization  
268 efficiency of biotinylated  $\beta$ 1AR or  $\beta$ 1V2Rpp nanodiscs was evaluated by incubating a fixed  
269 quantity of pre-washed high capacity neutravidin beads (10 uL) with increasing amounts of  
270 nanodisc (5-10  $\mu\text{g}$ ) at room temperature for 1 hour while rotating. After collecting flow through,  
271 the nanodisc-coated beads were washed three times and bound protein was eluted via boiling.  
272 Following SDS-PAGE and Coomassie Blue staining, a 1:1 ratio of receptor nanodisc ( $\mu\text{g}$ ) to bead  
273 slurry ( $\mu\text{L}$ ) was deemed optimal given minimal loss of nanodisc in the flow through. (B-C) To  
274 evaluate the integrity of the G protein and  $\beta$ -arrestin transducer complexes,  $\beta$ 1AR or  $\beta$ 1V2Rpp  
275 nanodiscs were immobilized to neutravidin beads along with 20  $\mu\text{M}$  of the high-affinity agonist,  
276 BI-167107 (BI), and a 1.2 molar excess of heterotrimeric G $\alpha$ s or  $\beta$ -arrestin1-mc, respectively. To  
277 enhance complex stability,  $\beta$ 1AR/G $\alpha$ s complexes were supplemented with Nb35 (2.5 molar excess  
278 with respect to  $\beta$ 1AR) and 0.05 U/mL apyrase, while the  $\beta$ 1V2Rpp/ $\beta$ -arrestin1 complex was further  
279 stabilized with Nb25 and Fab30 (2.5 or 1.7 molar excess relative to  $\beta$ 1V2Rpp, respectively).  
280 Following complex formation, the flow through was collected (FT #1) and the beads were washed  
281 three times with ice-cold binding buffer supplemented with 10  $\mu\text{M}$  BI. To simulate incubation with  
282 DNA-encoded molecules, 1mg/mL salmon sperm DNA was applied to neutravidin-immobilized

283  $\beta_1$ AR/Gs and  $\beta_1$ V<sub>2</sub>Rpp/ $\beta$ -arrestin1 complexes in binding buffer containing 20  $\mu$ M BI for 1 hour  
284 while agitating. The secondary flow through (FT #2) was collected, bound protein was eluted via  
285 boiling at 95 °C, and samples were loaded onto 10% SDS-polyacrylamide gels for analysis by  
286 Coomassie Blue to confirm the stability of receptor-transducer complexes throughout the selection  
287 protocol. **(D)** To validate the retention of small molecule ligands to the  $\beta_1$ AR or  $\beta_1$ V<sub>2</sub>Rpp nanodiscs  
288 during screening, 5 nM of the radiolabeled orthosteric antagonist, <sup>3</sup>H-DHA, was incubated with  
289 neutravidin-immobilized nanodiscs and washed three times with ice-cold binding buffer. To elute,  
290 beads were resuspended in 1.5% Fos-choline in water and incubated at 37 °C (15 min) then 95 °C  
291 (15 min) while agitating. The elution procedure was repeated a second time, combined, and applied  
292 to 5 mL scintillation fluid for overnight incubation. <sup>3</sup>H-DHA counts are presented as percent of  
293 input. Empty nanodiscs were utilized as a control to assess non-specific binding.

294  
295  
296

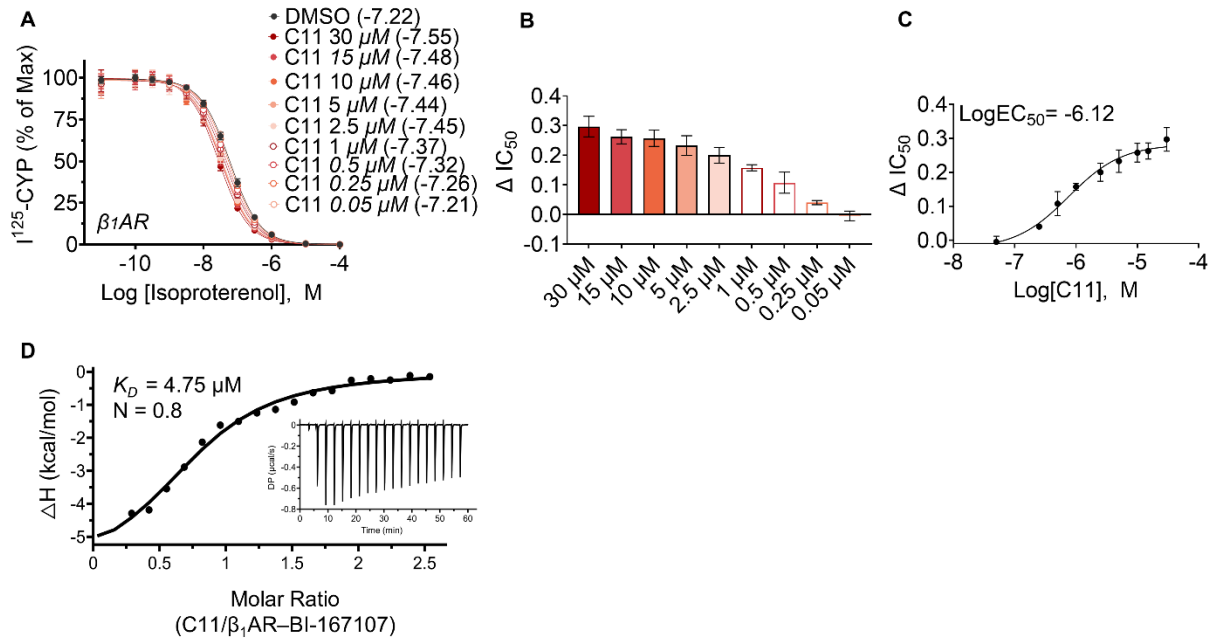

297  
 298 **Supplemental Fig. 3. Evaluation of the affinity of C11 for the  $\beta_1\text{AR}$ .** (A-C) Isoproterenol  
 299 competition binding curves testing serial doses of C11 (A), and the corresponding  $\text{IC}_{50}$  shift  
 300 quantifications (B) plotted as a function of  $[\text{C11}]$  (C) demonstrated that the binding affinity of C11  
 301 for the  $\beta_1\text{AR}$  is in the sub-micromolar range ( $\text{LogEC}_{50} = -6.12 \text{ M}$ ); dose response curves are  
 302 presented as percent of maximum  $\text{I}^{125}\text{-CYP}$  binding.  $\text{IC}_{50}$  values were calculated from the  
 303 nonlinear fit (one-site binding; GraphPad Prism) and plotted as the difference between  $\text{IC}_{50}$   
 304 (DMSO) and  $\text{IC}_{50}$  (C11). Data points represent mean  $\pm$  SEM of at least 3 independent experiments  
 305 performed in duplicate. (D) Isothermal titration calorimetry (ITC) analysis of C11 binding to BI-  
 306 bound  $\beta_1\text{AR}$ . Raw injection heats (insets) and fitted binding isotherms (solid lines) were modeled  
 307 using a one-site independent binding model. Apparent equilibrium dissociation constant ( $K_D$ ) and  
 308 stoichiometry ( $N$ ) values are shown as derived from the fit of an independent measurement.

309  
 310  
 311

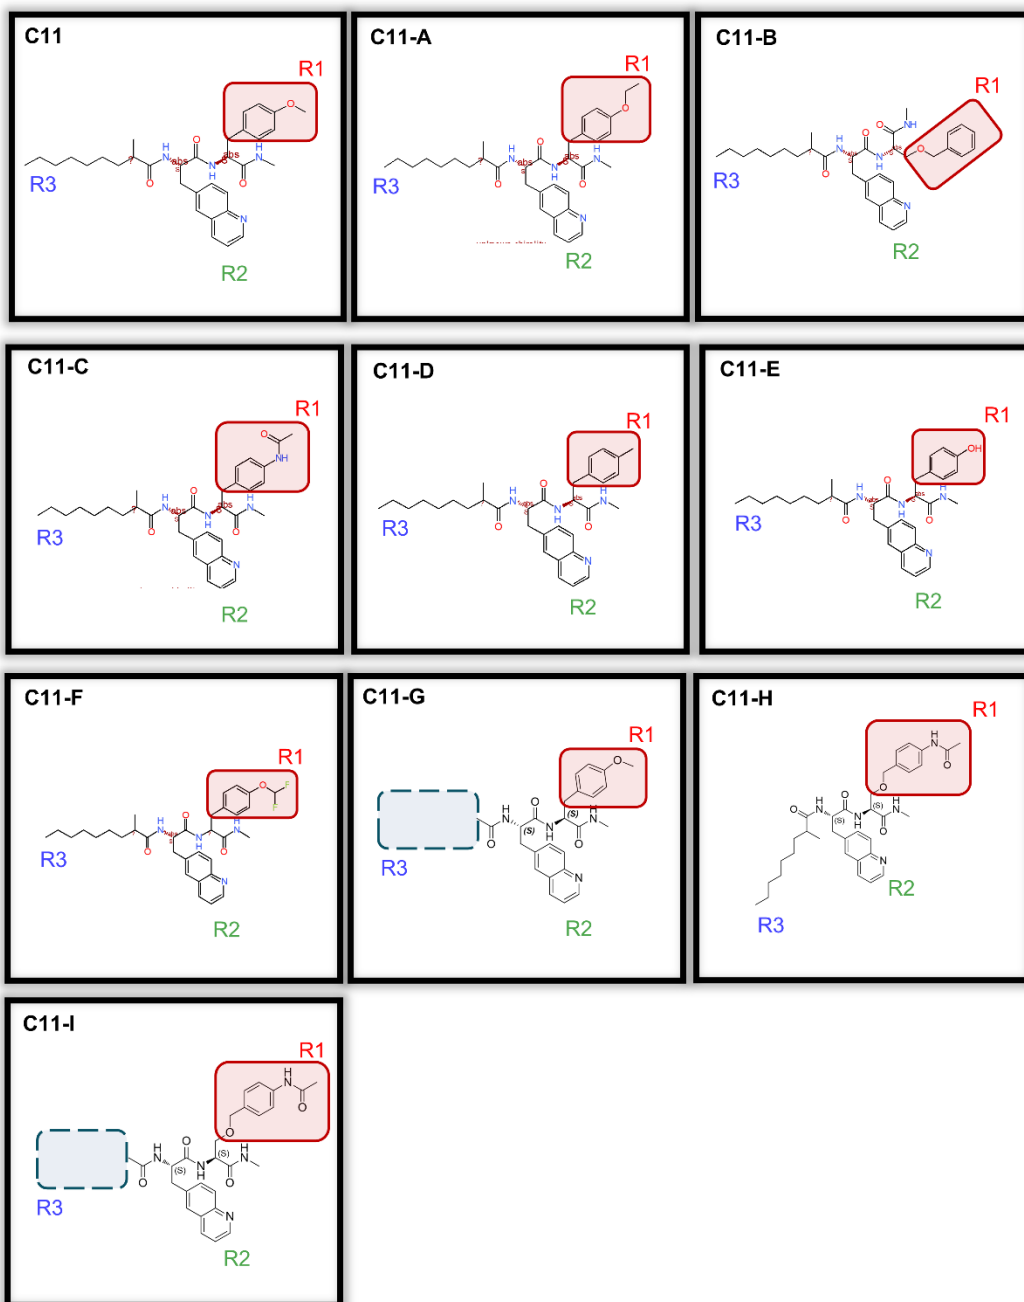

312  
 313 **Supplemental Fig. 4. Chemical structures of C11 analogs A-I.** The R1 chemical group (solid  
 314 rectangle) and R3 chemical group (dashed rectangle) were modified in analogs C11-A through  
 315 C11-I.  
 316

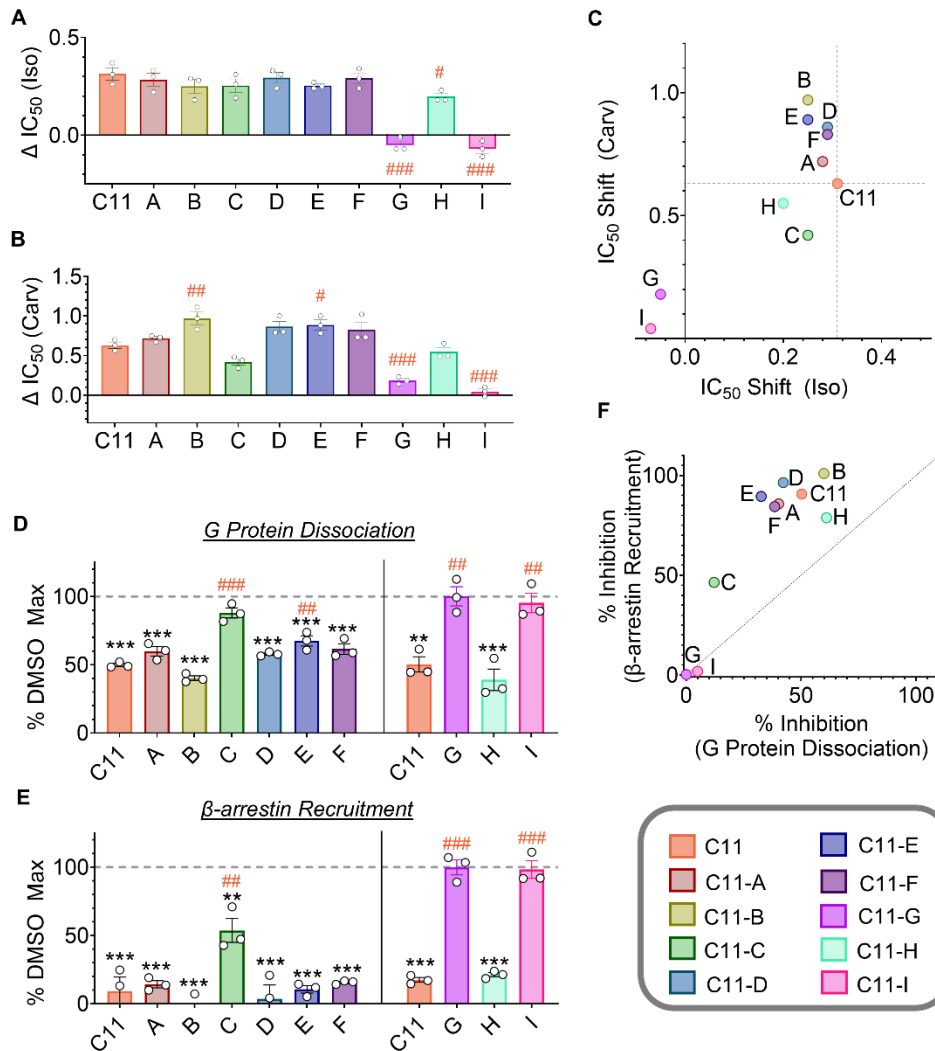

317  
 318 **Supplemental Fig. 5. Effect of C11 analogs A-I on orthosteric ligand binding and  $\beta_1$ AR-**  
 319 **mediated signaling. (A-C)**  $\beta_1$ AR nanodiscs were incubated with a fixed amount of radiolabeled  
 320 orthosteric antagonist,  $I^{125}$ -CYP, serial doses of unlabeled isoproterenol (A) or carvedilol (B), and  
 321 either DMSO (0.19%) or 30  $\mu$ M of C11 analogs. Quantification of  $IC_{50}$  log-shifts revealed that the  
 322 ability of C11 to potentiate isoproterenol (Iso) or carvedilol (Carv) to the  $\beta_1$ AR is largely  
 323 unaffected by modification of the R1 chemical group, whereas truncation of the R3 chemical group  
 324 (C11-G and H) resulted in complete loss of cooperativity.  $IC_{50}$  values were calculated from the  
 325 nonlinear fit (one-site binding; GraphPad prism) and plotted as the difference between  $IC_{50}$   
 326 (DMSO) and  $IC_{50}$  (C11). Data points represent mean  $\pm$  SEM of at least 3 independent experiments  
 327 performed in duplicate; one-way ANOVA, # $p < 0.05$ , ## $p < 0.01$ , ### $p < 0.001$  (compared to C11).  
 328 **(D-F)** Quantification of G protein dissociation (D) and  $\beta$ -arrestin recruitment (E) via BRET  
 329 revealed that the ability of C11 to inhibit  $\beta_1$ AR-mediated signaling is largely unaffected by  
 330 modification of the R1 group, whereas truncation of the R3 group (C11-G and H) resulted in  
 331 complete loss of antagonistic function; data points represent mean  $\pm$  SEM of at least 3 independent  
 332 experiments performed in duplicate; curve fits were plotted using a log(agonist) three-parameter  
 333 model in GraphPad Prism; net BRET ratios (emission of RLuc8/GFP) are baseline-subtracted

334 according to the non-linear fit of each treatment condition; one-way ANOVA, ##p<0.01,  
335 ###p<0.001 (compared to C11), \*\*p<0.01, \*\*\*p<0.001 (compared to vehicle).  
336  
337

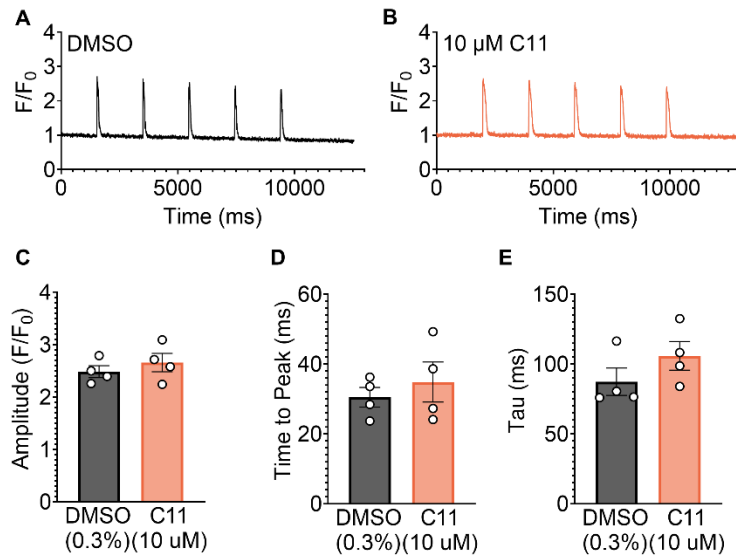

338  
 339 **Supplemental Fig. 6. Effect of C11 on electrically stimulated Ca<sup>2+</sup> transients in isolated**  
 340 **CSQ2<sup>-/-</sup> cardiomyocytes. (A-B)** Representative Ca<sup>2+</sup> transients obtained from CSQ2<sup>-/-</sup> ventricular  
 341 cardiomyocytes pre-treated with vehicle (A) or 10 μM C11 (B) during pacing at 0.5 Hz. (C-E) No  
 342 significant differences in Ca<sup>2+</sup> transient amplitude (F/F<sub>0</sub>, C), time to peak (D), or the decay constant  
 343 tau (E) were observed between groups; statistical significance was evaluated via t-test; data points  
 344 represent biological replicates (n = 4 hearts, 11-13 cells per treatment per heart).  
 345

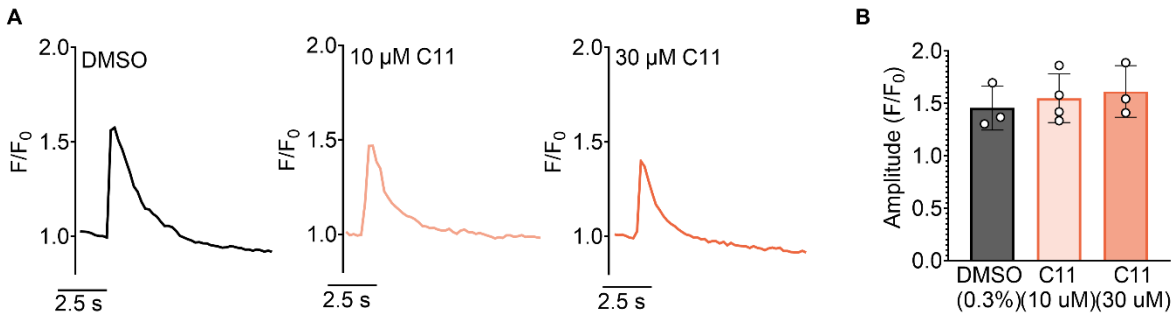

346  
 347 **Supplemental Fig. 7. Effect of C11 on caffeine-stimulated  $Ca^{2+}$  release in isolated wild-type**  
 348 **cardiomyocytes. (A-B)** Caffeine-induced  $Ca^{2+}$  transients (A) were measured in quiescent wild-  
 349 type cardiomyocytes pre-treated with vehicle or serial doses of C11 following treatment with 10  
 350 mM caffeine. No significant differences in  $Ca^{2+}$  transient amplitude ( $F/F_0$ , B) were observed  
 351 between groups; statistical significance was evaluated via one-way ANOVA, data points represent  
 352 biological replicates ( $n = 3$  hearts, 2-6 cells per treatment per heart).

353  
 354

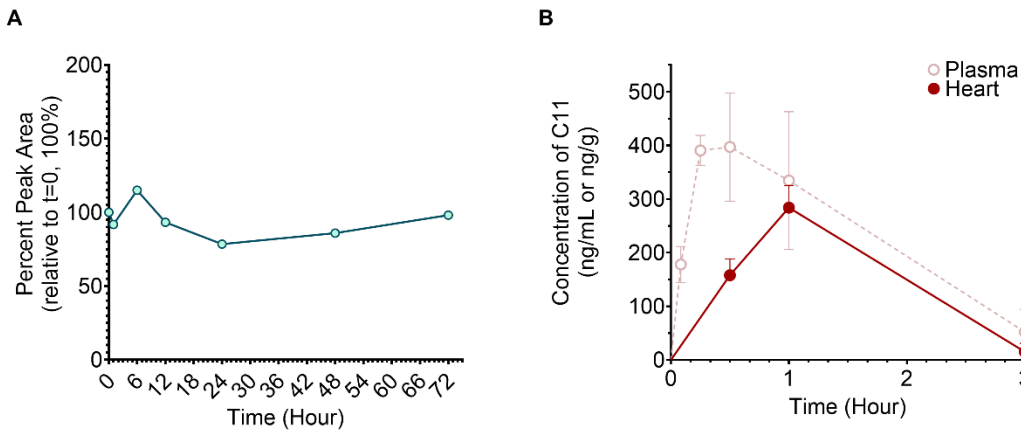

355  
 356 **Supplemental Fig. 8. Stability of C11 in solution and *in vivo*.** (A) C11 (10 mM) prepared in a  
 357 vehicle solution (50% DMSO, 50% PEG-400) was incubated at 37 °C for the indicated timepoints  
 358 and applied to HPLC/MS to assess chemical stability. Quantification of peak area revealed that  
 359 C11 is stable for at least three days at 37 °C (n=1). (B) The pharmacokinetic profile of C11 prepared  
 360 in a vehicle solution (10%DMA, 40% PEG-300, 2% Tween 80 and 48% saline) was obtained  
 361 following intraperitoneal injection (10 mg/kg) in wild-type mice. C11 is detectable at the highest  
 362 concentration between 30 minutes to 1-hour post-injection in plasma (ng/mL) and in heart tissue  
 363 (ng/g); data points represent the mean ± SD of all biological replicates (n=3-4 mice).  
 364  
 365

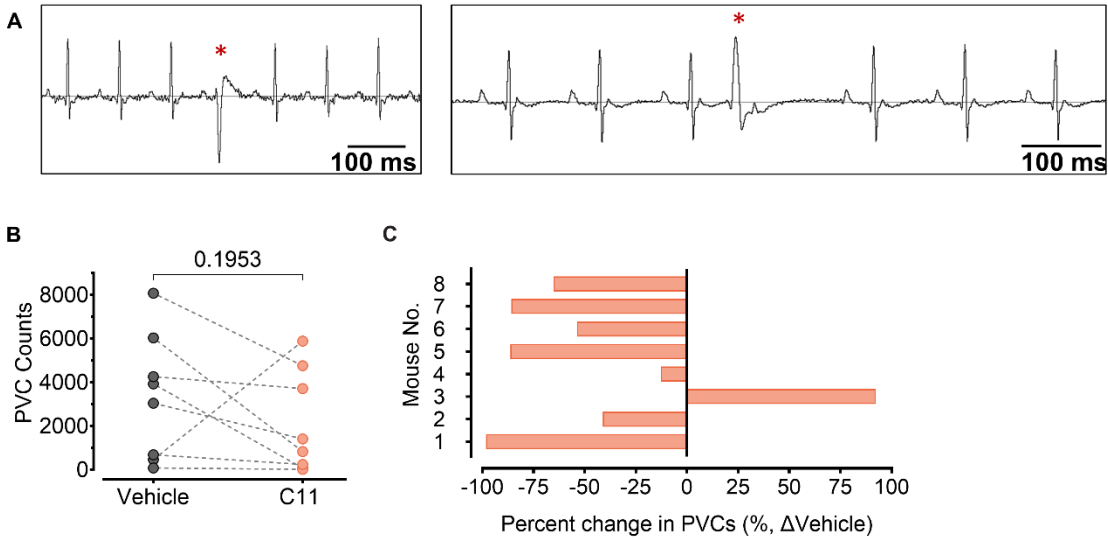

366  
 367 **Supplemental Fig. 9. Effect of C11 on the incidence of PVCs during graded treadmill**  
 368 **exercise. (A)** Representative electrocardiograms obtained via continuous telemetric recording  
 369 depict premature ventricular contractions (PVCs, red asterisks) in  $CSQ2^{-/-}$  mice during physical  
 370 exertion. **(B)** While most  $CSQ2^{-/-}$  mice exhibited a reduction in the incidence of PVCs during  
 371 exercise compared to when these same mice were pre-treated with vehicle, this was not statistically  
 372 significant; data points represent biological replicates ( $n = 8$  mice); Wilcoxon matched pairs signed  
 373 rank test,  $p=0.1953$ . **(C)** The percent change in total PVCs after C11 treatment compared to vehicle  
 374 was plotted for individual mice.  
 375

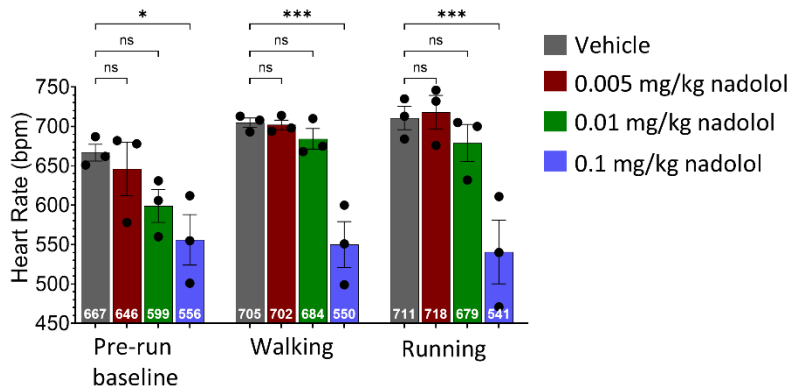

376  
377  
378  
379  
380  
381  
382  
383  
384

**Supplemental Fig. 10. Effect of nadolol on heart rate during treadmill activity in wild-type mice.** Heart rate was measured by wireless ECG telemetry in wild-type mice (n=3 per group) during three activity states: pre-run baseline, walking (2 cm/s), and running (10 cm/s). Each mouse received vehicle solution or nadolol at 0.005, 0.01, or 0.1 mg/kg in a repeated measures design, with a washout period of 7 days in between. Data are shown as mean ± SEM. Statistical analysis was performed using two-way repeated measures ANOVA followed by Dunnett's post hoc test comparing each dose to vehicle within each activity; \*p< 0.05, ns, not significant.

385 **Supplemental Table 1. IC<sub>50</sub> values from radioligand competition binding assays.**

| Ligand                             | IC <sub>50</sub> (DMSO), M | IC <sub>50</sub> (C11), M | Δ IC <sub>50</sub> |
|------------------------------------|----------------------------|---------------------------|--------------------|
| <i>β<sub>1</sub>AR Agonists</i>    |                            |                           |                    |
| Norepinephrine                     | -6.13±0.10                 | -6.57±0.10                | 0.44±0.02          |
| Isoproterenol                      | -7.29±0.06                 | -7.63±0.07                | 0.33±0.00          |
| Dobutamine                         | -5.65±0.05                 | -6.08±0.06                | 0.44±0.02          |
| Epinephrine                        | -5.61±0.06                 | -5.89±0.06                | 0.28±0.01          |
| <i>β<sub>1</sub>AR Antagonists</i> |                            |                           |                    |
| Carvedilol                         | -8.74±0.07                 | -9.24±0.05                | 0.50±0.04          |
| Bucindolol                         | -8.63±0.12                 | -8.98±0.07                | 0.35±0.06          |
| Alprenolol                         | -7.88±0.08                 | -8.09±0.07                | 0.21±0.02          |
| Atenolol                           | -5.62±0.08                 | -5.78±0.05                | 0.16±0.03          |
| Metoprolol                         | -6.67±0.02                 | -6.69±0.03                | 0.02±0.01          |
| Carazolol                          | -9.56±0.08                 | -9.56±0.06                | 0.01±0.02          |

386 β<sub>1</sub>AR nanodiscs were incubated with a fixed amount of radiolabeled orthosteric antagonist, I<sup>125</sup>-  
387 CYP, serial doses of unlabeled orthosteric ligand, and either DMSO (0.19%) or 30 μM C11. The  
388 resulting competition binding curves are plotted in Fig. 2A-B and corresponding IC<sub>50</sub> shift  
389 quantifications in Fig. 2C. IC<sub>50</sub> values (M, molar units) were calculated from the nonlinear fit (one-  
390 site binding; GraphPad prism) and are presented as the mean ± SEM of at least 3 independent  
391 experiments performed in duplicate. Statistical analysis of IC<sub>50</sub> shifts is included in Fig. 2C.  
392

393

**Supplemental Table 2. Primer sequences utilized to clone BRET biosensors**

| Fragment                               | Forward or Reverse | Primer Sequence (5'-3')                                      |
|----------------------------------------|--------------------|--------------------------------------------------------------|
| <b><math>\beta_1V_2R</math></b>        |                    |                                                              |
| $\beta_1AR\_G413$                      | Forward            | actcactatagggagaccaatgaagaccatcatcgcctgagctacatcttctg<br>cct |
| $\beta_1AR\_G413$                      | Reverse            | tgcgtccccggggcgcccgaggcgcgccggccgtct                         |
| $V_2R$                                 | Forward            | gcgcctcggggcgcccggggacgcacccca                               |
| $V_2R$                                 | Reverse            | ctctagatgcatgctcgagctcacgatgaagtgtccttgccagggagg             |
| <b><math>\beta_1V_2R</math>-RLucII</b> |                    |                                                              |
| $\beta_1AR\_G413$                      | Forward            | actcactatagggagaccaatgaagaccatcatcgcctgagctacatcttctg<br>cct |
| $\beta_1AR\_G413$                      | Reverse            | tgcgtccccggggcgcccgaggcgcgccggccgtct                         |
| $V_2R$ -RLucII                         | Forward            | Ggcgcctcggggcgcccggggacgcacccca                              |
| $V_2R$ -RLucII                         | Reverse            | Ctctagatgcatgctcgagcttactgctcgttcttcagcactctctccacgaagc      |

394 Fragments consisting of  $\beta_1AR$  truncated at residue G413 ( $\beta_1AR\_G413$ ) and  $V_2R$  were amplified  
395 and inserted into a linearized pcDNA3 empty vector to generate  $\beta_1V_2R$  via HiFi DNA assembly.  
396 Fragments consisting of  $\beta_1AR\_G413$  and  $V_2R$ -RLucII were amplified and inserted into a  
397 linearized pcDNA3 empty vector to generate  $\beta_1V_2R$ -RLucII via HiFi DNA assembly.  
398

399 **Supplemental Table 3. Effect of serial doses of C11 on contractility in isolated wild-type and**  
 400  **$\beta_1$ AR KO adult cardiomyocytes**

| <b>Wild-type cardiomyocytes</b>                 |                    |                                |                                 |                                   |
|-------------------------------------------------|--------------------|--------------------------------|---------------------------------|-----------------------------------|
| <b>Parameter</b>                                | <b>Treatment</b>   |                                |                                 |                                   |
|                                                 | <b>DMSO (0.3%)</b> | <b>3 <math>\mu</math>M C11</b> | <b>30 <math>\mu</math>M C11</b> | <b>30 <math>\mu</math>M C11-G</b> |
| Baseline SL ( $\mu$ m)                          | 1.72 $\pm$ 0.01    | 1.76 $\pm$ 0.02                | 1.81 $\pm$ 0.02                 | 1.70 $\pm$ 0.01                   |
| Time to Peak (75%, ms)                          | 62.28 $\pm$ 1.73   | 62.02 $\pm$ 1.46               | 62.74 $\pm$ 3.83                | 55.80 $\pm$ 2.44                  |
| Contraction Velocity ( $\mu$ m/sec)             | -4.38 $\pm$ 0.25   | -3.84 $\pm$ 0.13               | -1.51 $\pm$ 0.11                | -5.02 $\pm$ 0.10                  |
| Peak SL ( $\mu$ m)                              | 1.46 $\pm$ 0.01    | 1.54 $\pm$ 0.02                | 1.71 $\pm$ 0.02                 | 1.43 $\pm$ 0.02                   |
| Sarcomeric Shortening (%)                       | 15.18 $\pm$ 0.49   | 12.98 $\pm$ 0.36               | 5.30 $\pm$ 0.44                 | 15.71 $\pm$ 0.66                  |
| Time to Baseline (75%, ms)                      | 112.33 $\pm$ 5.65  | 108.94 $\pm$ 8.43              | 142.84 $\pm$ 12.53              | 113.36 $\pm$ 9.53                 |
| Relaxation Velocity ( $\mu$ m/sec)              | 3.47 $\pm$ 0.21    | 3.25 $\pm$ 0.17                | 1.05 $\pm$ 0.13                 | 3.59 $\pm$ 0.17                   |
| <b><math>\beta_1</math>AR KO cardiomyocytes</b> |                    |                                |                                 |                                   |
| <b>Parameter</b>                                | <b>Treatment</b>   |                                |                                 |                                   |
|                                                 | <b>DMSO (0.3%)</b> | <b>3 <math>\mu</math>M C11</b> | <b>10 <math>\mu</math>M C11</b> | <b>30 <math>\mu</math>M C11</b>   |
| Baseline SL ( $\mu$ m)                          | 1.64 $\pm$ 0.02    | 1.71 $\pm$ 0.02                | 1.73 $\pm$ 0.01                 | 1.78 $\pm$ 0.01                   |
| Time to Peak (75%, ms)                          | 74.36 $\pm$ 2.92   | 69.38 $\pm$ 5.50               | 75.96 $\pm$ 3.21                | 71.10 $\pm$ 2.63                  |
| Contraction Velocity ( $\mu$ m/sec)             | -3.01 $\pm$ 0.36   | -3.01 $\pm$ 0.39               | -2.20 $\pm$ 0.20                | -1.69 $\pm$ 0.27                  |
| Peak SL ( $\mu$ m)                              | 1.45 $\pm$ 0.02    | 1.51 $\pm$ 0.03                | 1.58 $\pm$ 0.02                 | 1.66 $\pm$ 0.03                   |
| Sarcomeric Shortening (%)                       | 12.03 $\pm$ 0.83   | 11.35 $\pm$ 0.78               | 8.88 $\pm$ 0.61                 | 6.48 $\pm$ 1.13                   |
| Time to Baseline (75%, ms)                      | 158.74 $\pm$ 13.98 | 139.52 $\pm$ 9.04              | 153.09 $\pm$ 3.16               | 164.86 $\pm$ 19.82                |
| Relaxation Velocity ( $\mu$ m/sec)              | 2.07 $\pm$ 0.28    | 2.24 $\pm$ 0.26                | 1.63 $\pm$ 0.12                 | 1.21 $\pm$ 0.36                   |

401 Contractility parameters measured from isolated wild-type or  $\beta_1$ AR<sup>-/-</sup> cardiomyocytes during 1  
 402 Hz pacing (n= 4-7 hearts; 7-10 cells per treatment per heart). Statistical analysis of normalized  
 403 sarcomeric shortening is included in Figure 6C-D. Values are represented  $\pm$  SEM. SL, sarcomere  
 404 length

405 **References**

- 406 1. Harding SD, Armstrong JF, Faccenda E, Southan C, Alexander SPH, Davenport AP, et al.  
407 The IUPHAR/BPS Guide to PHARMACOLOGY in 2024. *Nucleic Acids Res.*  
408 2024;52(D1):D1438-D49.
- 409 2. Rasmussen SG, DeVree BT, Zou Y, Kruse AC, Chung KY, Kobilka TS, et al. Crystal  
410 structure of the beta2 adrenergic receptor-Gs protein complex. *Nature.*  
411 2011;477(7366):549-55.
- 412 3. Staus DP, Hu H, Robertson MJ, Kleinhenz ALW, Wingler LM, Capel WD, et al. Structure  
413 of the M2 muscarinic receptor-beta-arrestin complex in a lipid nanodisc. *Nature.*  
414 2020;579(7798):297-302.
- 415 4. Staus DP, Wingler LM, Choi M, Pani B, Manglik A, Kruse AC, et al. Sortase ligation  
416 enables homogeneous GPCR phosphorylation to reveal diversity in beta-arrestin coupling.  
417 *Proc Natl Acad Sci U S A.* 2018;115(15):3834-9.
- 418 5. Shukla AK, Manglik A, Kruse AC, Xiao K, Reis RI, Tseng WC, et al. Structure of active  
419 beta-arrestin-1 bound to a G-protein-coupled receptor phosphopeptide. *Nature.*  
420 2013;497(7447):137-41.
- 421 6. Cahill TJ, 3rd, Thomsen AR, Tarrasch JT, Plouffe B, Nguyen AH, Yang F, et al. Distinct  
422 conformations of GPCR-beta-arrestin complexes mediate desensitization, signaling, and  
423 endocytosis. *Proc Natl Acad Sci U S A.* 2017;114(10):2562-7.
- 424 7. Tang Y, Hu LA, Miller WE, Ringstad N, Hall RA, Pitcher JA, et al. Identification of the  
425 endophilins (SH3p4/p8/p13) as novel binding partners for the beta1-adrenergic receptor.  
426 *Proc Natl Acad Sci U S A.* 1999;96(22):12559-64.
- 427 8. Wang J, Pani B, Gokhan I, Xiong X, Kahsai AW, Jiang H, et al. beta-Arrestin-Biased  
428 Allosteric Modulator Potentiates Carvedilol-Stimulated beta Adrenergic Receptor  
429 Cardioprotection. *Mol Pharmacol.* 2021;100(6):568-79.
- 430 9. Shenoy SK, McDonald PH, Kohout TA, and Lefkowitz RJ. Regulation of receptor fate by  
431 ubiquitination of activated beta 2-adrenergic receptor and beta-arrestin. *Science.*  
432 2001;294(5545):1307-13.
- 433 10. Chen Q, Cheng X, Zhang L, Li X, Chen P, Liu J, et al. Exploring the Lower Limit of  
434 Individual DNA-Encoded Library Molecules in Selection. *SLAS Discov.* 2020;25(5):523-  
435 9.
- 436 11. Luo J, Busillo JM, and Benovic JL. M3 muscarinic acetylcholine receptor-mediated  
437 signaling is regulated by distinct mechanisms. *Mol Pharmacol.* 2008;74(2):338-47.  
438
